# Supplementary material
Source: PubMed Central journal article supplement (PMC3020936)

Figure S2

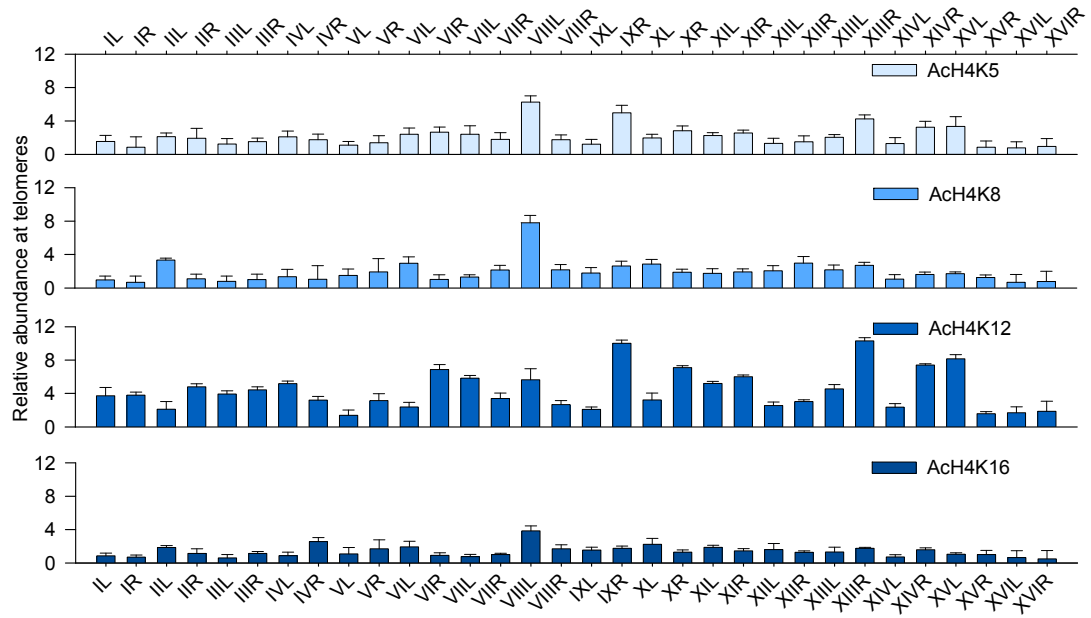

Supplement: pgen.1001272.s002.pdf [file pgen.1001272.s002.pdf]

Figure S3

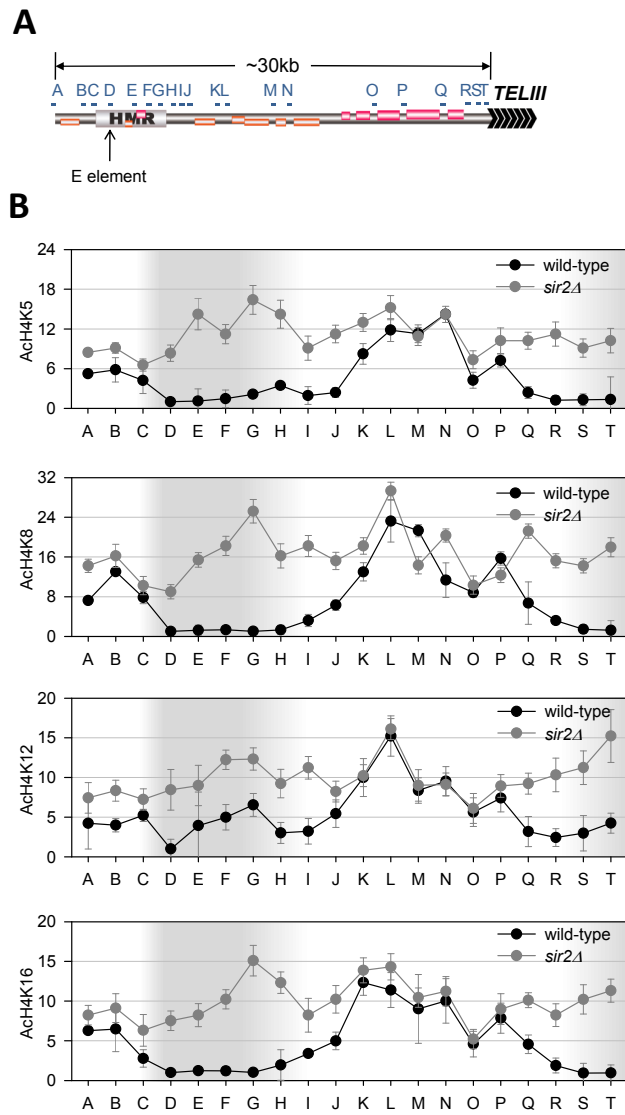

Supplement: pgen.1001272.s003.pdf [file pgen.1001272.s003.pdf]

Figure S4

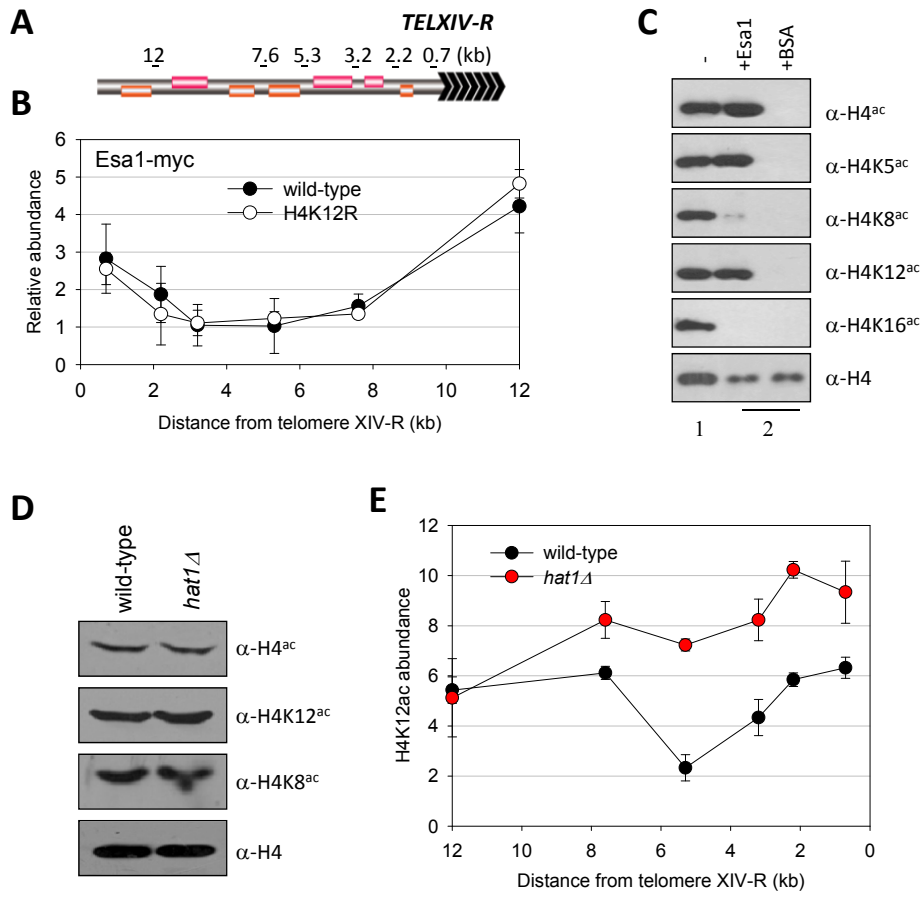

Supplement: pgen.1001272.s004.pdf [file pgen.1001272.s004.pdf]

Figure S5

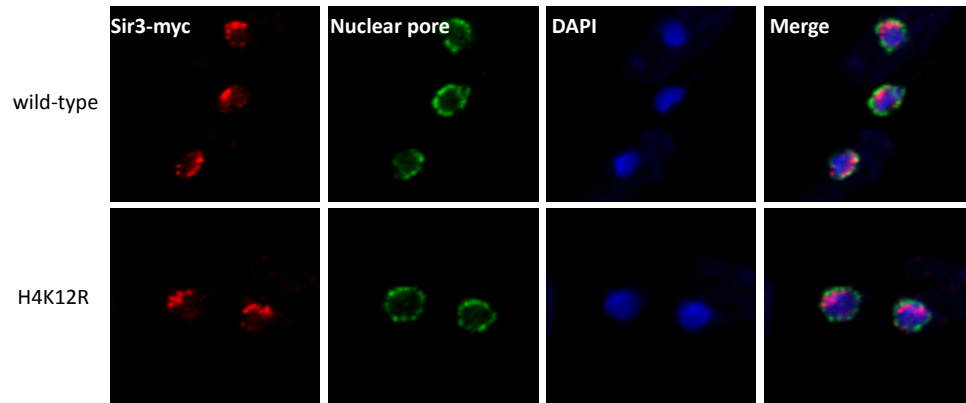

Supplement: pgen.1001272.s005.pdf [file pgen.1001272.s005.pdf]

Figure S6

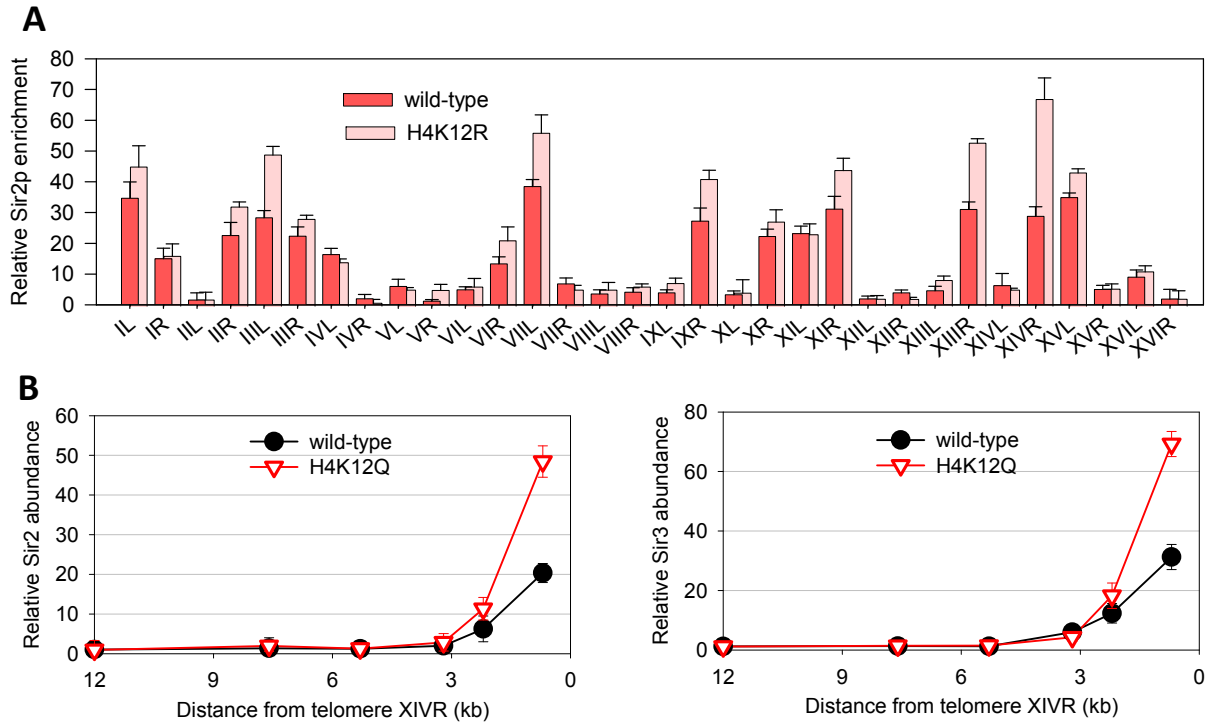

Supplement: pgen.1001272.s006.pdf [file pgen.1001272.s006.pdf]

Figure S7

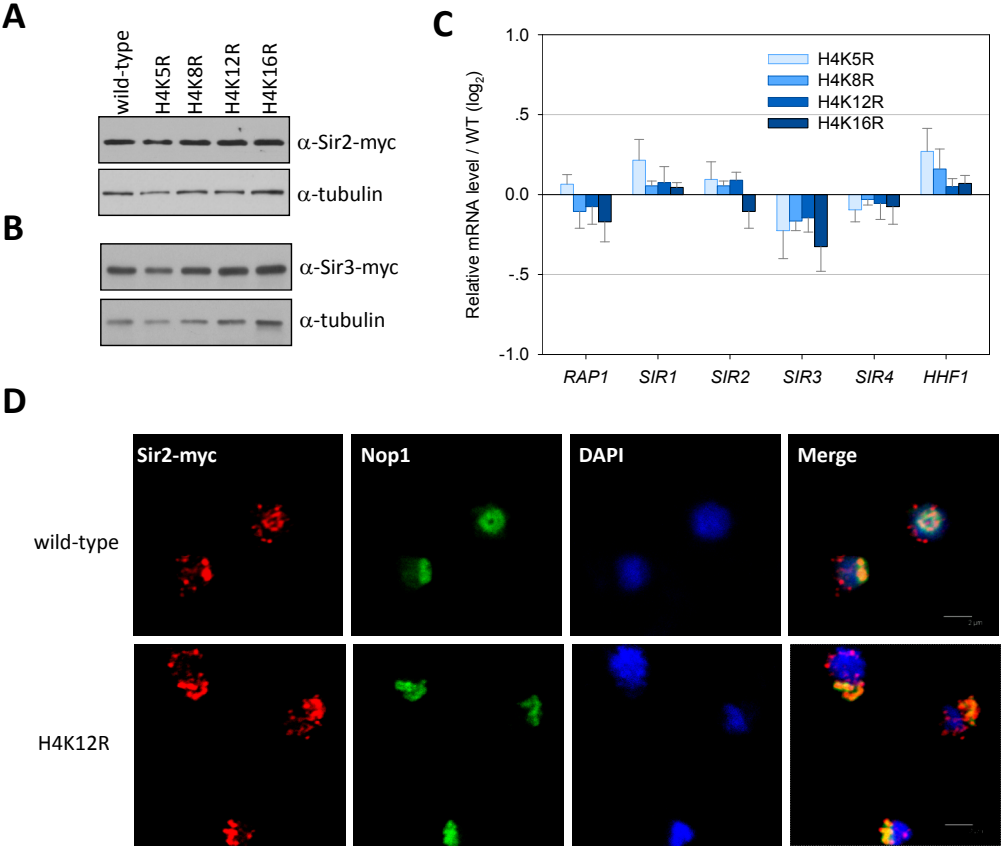

Supplement: pgen.1001272.s007.pdf [file pgen.1001272.s007.pdf]
